# Supplementary material
Source: PubMed Central journal article supplement (PMC1513068)
Supplement: nrs04014.sp1.pdf [file nrs04014.sp1.pdf]

Biological Scoring Part

Experimental Scoring Part

| Score | Protein Name | Complex ID                        | Enzymatic Activity (9)                                                                                                                                                            | Cellular Processes (6)                                                                                                                                             | Human Disease (4)                                                                                                                                      | Protein Motif (2)                | Interacting Protein (2) | Full c-DNA name (2) | Antibody (2) | KO ES cell (3) |
|-------|--------------|-----------------------------------|-----------------------------------------------------------------------------------------------------------------------------------------------------------------------------------|--------------------------------------------------------------------------------------------------------------------------------------------------------------------|--------------------------------------------------------------------------------------------------------------------------------------------------------|----------------------------------|-------------------------|---------------------|--------------|----------------|
| 30    | Msh2         | CBP NE                            | 1. ATP binding activity<br>2. Damaged DNA binding activity                                                                                                                        | 1. Mismatch repair<br>2. Negative regulation of cell cycle<br>3. Postreplication repair                                                                            | 1. Colorectal cancer<br>2. Hereditary nonpolyposis type 1<br>3. Muir-torre family cancer syndrome                                                      | 1. MUTSd<br>2. MUTSac            | YES                     | MHS1011-76852       | YES          | YES            |
| 29    | Msh6         | 1. P300<br>2. CBP<br>3. COREST NE | 1. ATP binding activity<br>2. Damaged DNA binding activity                                                                                                                        | 1. Mismatch repair                                                                                                                                                 | 1. Colorectal cancer hereditary nonpolyposis<br>2. Endometrial Cancer<br>3. Colon cancer hereditary nonpolyposis<br>4. Ovarian cancer endometrial type | 1. PWWP<br>2. MUTSd<br>3. MUTSac | YES                     | MHS1011-60683       | YES          | NO             |
| 28    | PRPF8        | CDK7 NE                           | RNA binding activity                                                                                                                                                              | 1. Nuclear mRNA splicing via spliceosome<br>2. Visual perception                                                                                                   | Retinitis pigmentosa                                                                                                                                   | JAB                              | YES                     | MHS1010-9206011     | NO           | YES            |
| 28    | CTDP1        | CRASP2 NE                         | 1. DNA-directed RNA polymerase activity<br>2. Hydrolase activity<br>3. Phosphoprotein phosphatase activity                                                                        | 1. Protein amino acid dephosphorylation<br>2. Transcription from RNA polymerase II promoter                                                                        | CCFDN syndrome                                                                                                                                         | BRCT                             | YES                     | NO                  | YES          | YES            |
| 28    | VCP          | SRC-1 NE                          | ATPase activity                                                                                                                                                                   | Protein ubiquitination                                                                                                                                             | IBMPFD                                                                                                                                                 | AAA                              | YES                     | NO                  | YES          | YES            |
| 27    | PRPF3        | CDK7 NE                           | 1. RNA splicing factor activity<br>2. Transesterification activity                                                                                                                | 1. Nuclear mRNA splicing via spliceosome<br>2. Visual perception                                                                                                   | Retinitis pigmentosa 18                                                                                                                                | PWI                              | YES                     | MHS1011-59472       | YES          | NO             |
| 26    | Ku86(XRCC5)  | CAPER S100                        | 1. ATP-dependent DNA helicase activity<br>2. Double-stranded DNA binding activity<br>3. Helicase activity<br>4. Hydrolase activity                                                | DNA Repair                                                                                                                                                         | NO                                                                                                                                                     | 1. VWA<br>2. Ku78                | YES                     | MHS1011-76130       | YES          | YES            |
| 26    | Ku70(G22P1)  | CAPER S100                        | 1. ATP-dependent DNA helicase activity<br>2. Double-stranded DNA binding activity<br>3. Helicase activity<br>4. Hydrolase activity                                                | DNA Repair                                                                                                                                                         | NO                                                                                                                                                     | 1. VWA<br>2. Ku78<br>3. SAP      | YES                     | MHS1011-62157       | YES          | YES            |
| 26    | CDK7         | CDK7 S100                         | 1. ATP binding activity<br>2. Cyclin-dependent protein kinase activity                                                                                                            | 1. DNA repair<br>2. Cell division<br>3. Cell proliferation<br>4. Protein amino acid phosphorylation<br>5. Regulation of cyclin dependent protein kinase activity   | NO                                                                                                                                                     | S/T KINASE domain                | YES                     | IHS1382-8444794     | YES          | YES            |
| 26    | PARP1        | CRASP2 NE                         | 1. DNA binding activity<br>2. NAD+ ADP-ribosyltransferase activity<br>3. Metal ion binding<br>4. Glycosyl groups transfere activity                                               | 1. ADP-ribosylation of protein<br>2. Transcription from RNA polymerase II promoter                                                                                 | NO                                                                                                                                                     | 1. BRCT<br>2. NLS                | YES                     | MHS1010-7508040     | YES          | YES            |
| 26    | Itch         | SRC-1 NE                          | Ub-protein ligase activity                                                                                                                                                        | 1. Inflammatory response<br>2. ubi cycle                                                                                                                           | NO                                                                                                                                                     | 1. C2<br>2. WW<br>3. HECT        | YES                     | MHS1011-76852       | YES          | YES            |
| 25    | ERCC3        | CDK7 NE                           | 1. 3' to 5' DNA helicase activity<br>2. ATP binding activity<br>3. ATP-dependent DNA helicase activity<br>4. Damaged DNA binding<br>5. Helicase activity<br>6. Hydrolase activity | 1. DNA topological change<br>2. Induction of apoptosis<br>3. Nucleotide-excision repair<br>4. Perception of sound<br>5. Regulation of transcription, DNA-dependent | 1. Xeroderma pigmentosum group b<br>2. Trichothiodystrophy                                                                                             | 1. DEXDc<br>2. HELIC             | YES                     | NO                  | YES          | NO             |

|    |                     |                  |                                                                                                                                                                                         |                                                                                                                                                                                   |                                                    |                             |     |                 |     |     |
|----|---------------------|------------------|-----------------------------------------------------------------------------------------------------------------------------------------------------------------------------------------|-----------------------------------------------------------------------------------------------------------------------------------------------------------------------------------|----------------------------------------------------|-----------------------------|-----|-----------------|-----|-----|
| 25 | ERCC2               | CDK7 NE          | 1. 5' to 3' DNA helicase activity<br>2. ATP binding activity<br>3. ATP-dependent DNA helicase activity<br>4. DNA binding activity<br>5. Hydrolase activity,<br>6. Magnesium ion binding | 1. Induction of apoptosis<br>2. Perception of sound<br>3. Regulation of DNA-dependent transcription<br>4. Transcription-coupled nucleotide-excision repair                        | 1. Xeroderma pigmentosum<br>2. Trichothiodystrophy | 1. DEXDc<br>2. HELIC        | YES | IHS1380-8845483 | NO  | NO  |
| 25 | Mre11               | P300 NE          | 1. 3'-5' exonuclease activity<br>2. Double-stranded DNA binding<br>3. Hydrolase activity<br>4. Manganese ion binding<br>5. Single-stranded DNA specific endodeoxyribonuclease activity  | 1. Double-strand break repair via nonhomologous end-joining<br>2. Meiotic recombination<br>3. Regulation of mitotic recombination<br>4. Telomerase-dependent telomere maintenance | Ataxia-telangiectasia-like disorder                | CC                          | YES | MHS1010-9205853 | YES | NO  |
| 24 | U5-116KD            | CDK7 NE          | 1. GTP binding activity<br>2. GTPase activity                                                                                                                                           | 1. RNA splicing<br>2. Protein biosynthesis                                                                                                                                        | NO                                                 | GTP_EFTU_D2                 | YES | MHS1011-58684   | NO  | YES |
| 24 | GTF2H1              | CDK7 NE          | RNA polymerase subunit kinase activity                                                                                                                                                  | 1. DNA repair<br>2. Regulation of cyclin dependent protein kinase activity<br>3. Regulation of DNA-dependent transcription                                                        | NO                                                 |                             | YES | MHS1011-61176   | YES | YES |
| 24 | AOF2 (LSD1)         | COREST S100 + NE | Oxidoreductase activity                                                                                                                                                                 | 1. Chromatin modification<br>2. Electron transport<br>3. Regulation of DNA-dependent transcription                                                                                | NO                                                 |                             | YES | MHS1010-9204067 | YES | YES |
| 24 | HSPCB               | CRASP2 NE        | 1. ATP binding activity<br>2. TPR domain binding activity<br>3. Nitric-oxide synthase regulator activity                                                                                | 1. Positive regulation of nitric oxide biosynthesis<br>2. Protein folding and unfolding response                                                                                  | NO                                                 | CC                          | YES | MHS1011-60639   | YES | YES |
| 24 | G22P1(XRCC6)        | CRASP2 NE        | 1. ATP binding activity<br>2. ATP-dependent DNA helicase activity<br>3. Double-stranded DNA binding activity<br>4. Helicase activity<br>5. Hydrolase activity                           | 1. DNA ligation<br>2. DNA recombination<br>3. DNA repair                                                                                                                          | NO                                                 | 1. VWA<br>2. Ku78<br>3. SAP | YES | MHS1011-62157   | NO  | YES |
| 23 | ASF-3 (SFRS1)       | CAPER NE         | RNA binding activity                                                                                                                                                                    | mRNA Processing                                                                                                                                                                   | NO                                                 | RRM                         | YES | MHS1010-7429423 | YES | NO  |
| 23 | PRPF4               | CDK7 NE          | 1. RNA splicing factor activity<br>2. Transesterification mechanism                                                                                                                     | Nuclear mRNA splicing via spliceosome                                                                                                                                             | NO                                                 | WD40                        | YES | MHS1011-169916  | YES | NO  |
| 23 | GTF2H2              | CDK7 NE          | Metal ion binding activity                                                                                                                                                              | 1. DNA repair response to UV<br>2. Transcription initiation                                                                                                                       | NO                                                 | VWA                         | YES | IHS1382-8528419 | YES | NO  |
| 23 | PHKG2               | E6AP S100        | 1. ATP binding activity<br>2. Calmodulin binding<br>3. Phosphorylase kinase activity<br>4. Serine/Threonine kinase activity                                                             | Calcium signaling pathway                                                                                                                                                         | Glycogen storage disease                           | S/T KINASE domain           | NO  | MHS1011-59114   | NO  | NO  |
| 23 | ATR                 | SRC-2 NE         | S/T kinase (PI3KC) activity                                                                                                                                                             | 1. DNA repair<br>2. Cell cycle                                                                                                                                                    | Seckel syndrom                                     | PI3KC domain                | YES | NO              | NO  | NO  |
| 22 | BIRC6               | ASC-1 NE         | 1. Cysteine protease inhibitor activity<br>2. Ubiquitin conjugating enzyme activity                                                                                                     | 1. Anti-apoptosis and Apoptosis<br>2. Ubiquitin cycle                                                                                                                             | NO                                                 | 1. BIR<br>2. UBC<br>3. CC   |     | NO              | YES | YES |
| 22 | sRm300 (SRRM2)      | Caper NE         | RNA binding activity                                                                                                                                                                    | Nucleic acid metabolism                                                                                                                                                           | NO                                                 | RBD                         | YES | NO              | NO  | YES |
| 22 | U5-200 KD (ASCC3L1) | Caper NE         | 1. ATP binding activity<br>2. ATP-dependent RNA helicase activity<br>3. Hydrolase activity<br>4. Nucleic acid binding<br>5. Type III site-specific deoxyribonuclease activity           | 1. Folate biosynthesis<br>2. Starch and sucrose metabolism<br>3. mRNA Processing                                                                                                  | NO                                                 | 1. DEXDc<br>2. HELIC        | YES | NO              | NO  | YES |
| 22 | U2AF2               | CAPER NE         | RNA binding activity                                                                                                                                                                    | mRNA Processing                                                                                                                                                                   | NO                                                 | RRM                         | YES | NO              | NO  | YES |

|    |                           |                                    |                                                                                                                       |                                                                                                                                                                                                  |                        |                                                           |     |                 |     |     |
|----|---------------------------|------------------------------------|-----------------------------------------------------------------------------------------------------------------------|--------------------------------------------------------------------------------------------------------------------------------------------------------------------------------------------------|------------------------|-----------------------------------------------------------|-----|-----------------|-----|-----|
| 22 | CrkRS kinase (CRK7)       | CAPER S100                         | 1. ATP binding activity<br>2. Serine/Threonine kinase activity                                                        | 1. Sphingoglycolipid metabolism<br>2. Inositol phosphate metabolism<br>3. Starch and sucrose metabolism<br>4. Benzoate degradation via CoA ligation<br>5. Nicotinate and nicotinamide metabolism | NO                     | S/T KINASE domain                                         | YES | NO              | NO  | YES |
| 22 | ASCC3L1                   | CDK7 NE                            | 1. ATP binding activity<br>2. ATP-dependent RNA helicase activity<br>3. DNA binding activity<br>4. Hydrolase activity | Nuclear mRNA splicing via spliceosome                                                                                                                                                            | NO                     | 1. DEXDc<br>2. HELIC                                      | YES | NO              | NO  | YES |
| 22 | TOP2A                     | CDK7 NE                            | 1. ATP binding activity<br>2. DNA topoisomerase (ATP-hydrolyzing) activity                                            | 1. DNA repair<br>2. DNA replication<br>3. DNA topological change<br>4. Phosphoinositide-mediated signaling                                                                                       | NO                     | CC                                                        | YES | NO              | YES | YES |
| 22 | C20orf14                  | CDK7 NE                            | 1. RNA splicing factor activity<br>2. Transesterification activity                                                    | 1. RNA splicing<br>2. Spliceosome assembly                                                                                                                                                       | NO                     | HAT                                                       | YES | NO              | NO  | YES |
| 22 | DDX23                     | CDK7 NE                            | 1. ATP binding activity<br>2. ATP-dependent helicase activity<br>3. Hydrolase activity                                | Nuclear mRNA splicing via spliceosome                                                                                                                                                            | NO                     | 1. DEXDc<br>2. HELIC                                      | NO  | MHS1011-58554   | NO  | YES |
| 22 | SEPT2                     | CDK7 NE                            | 1. GTP binding activity<br>2. GTPase activity                                                                         | 1. Cell cycle<br>2. Cytokinesis                                                                                                                                                                  | NO                     | CC                                                        | YES | IHS1380-8846820 | NO  | YES |
| 22 | ZNF198                    | COREST NE                          | Zinc ion binding activity                                                                                             | Regulation of DNA-dependent transcription                                                                                                                                                        | Lymphoblastic lymphoma | TRASH                                                     | YES | MHS1010-7295295 | NO  | YES |
| 22 | POLR2A                    | CRASP2 NE                          | 1. DNA binding activity<br>2. DNA-directed RNA polymerase activity<br>3. Metal ion binding activity                   | 1. Regulation of DNA-dependent transcription<br>2. Androgen receptor signaling pathway                                                                                                           | NO                     | CC                                                        | YES | NO              | YES | YES |
| 22 | KHDRBS1                   | CRASP2 NE                          | 1. DNA binding activity<br>2. RNA binding activity<br>3. SH3/SH2 adaptor activity                                     | 1. G2/M transition of mitotic cell cycle<br>2. Cell proliferation<br>3. Cell cycle arrest<br>4. Regulation of RNA-nucleus export                                                                 | NO                     | KH                                                        | YES | MHS1011-59741   | NO  | YES |
| 22 | PKM2                      | CRASP2 NE                          | 1. Magnesium ion binding activity<br>2. Pyruvate kinase activity                                                      | Glycolysis                                                                                                                                                                                       | NO                     |                                                           | YES | NO              | YES | YES |
| 22 | Highwire (MYCBP2)         | E6AP S100                          | 1. Ubiquitin-protein ligase activity<br>2. Zinc ion binding activity                                                  | Protein ubiquitination                                                                                                                                                                           | NO                     | 1. RHD<br>2. BBOX<br>3. ZNFC2<br>4. SP<br>5. LZ<br>6. NLS | YES | NO              | NO  | YES |
| 22 | phosphorylase kinase beta | E6AP S100                          | 1. Calmodulin binding activity<br>2. Phosphorylase kinase activity<br>3. Horylase kinase regulator activity           | 1. Carbohydrate metabolism<br>2. Generation of precursor metabolites and energy<br>3. Glycogen catabolism                                                                                        | NO                     |                                                           | NO  | NO              | NO  | YES |
| 22 | DDX24                     | P300 NE                            | 1. ATP binding activity<br>2. ATP-dependent RNA helicase activity<br>3. RNA binding activity<br>4. Hydrolase activity | RNA metabolism                                                                                                                                                                                   | NO                     | 1. DEXDc<br>2. HELIC                                      | YES | NO              | NO  | YES |
| 22 | P532                      | P300 NE                            | 1. Guanly nucleotide exchnaging factor activity<br>2. Ubi-protein ligase activity                                     | Ubi cycle                                                                                                                                                                                        | NO                     | 1. SPRY<br>2. WD40<br>3. HECT                             | YES | NO              | NO  | YES |
| 22 | RbBP 6                    | SRC-1 NE                           | Ubiquitin-specific protease activity                                                                                  | Cell Cycle                                                                                                                                                                                       | NO                     | 1. ZN-F<br>2. RING                                        | YES | NO              | NO  | YES |
| 21 | HDAC2                     | 1. ASC-1 NE<br>2. COREST S100 + NE | 1. Histone deacetylase activity<br>2. Hydrolase activity                                                              | 1. Chromatin modification<br>2. Histone deacetylation<br>3. Regulation of DNA-dependent transcription<br>4. Cell Cycle<br>5. Notch signaling.                                                    | NO                     | CC                                                        | YES | MHS1010-7296041 | YES | NO  |

|    |                              |                          |                                                                                                                         |                                                                                                                                                                                                                                   |                                                                                 |                               |     |                 |     |     |
|----|------------------------------|--------------------------|-------------------------------------------------------------------------------------------------------------------------|-----------------------------------------------------------------------------------------------------------------------------------------------------------------------------------------------------------------------------------|---------------------------------------------------------------------------------|-------------------------------|-----|-----------------|-----|-----|
| 21 | KIF23                        | ASC-1 NE                 | 1. ATP binding activity<br>2. Microtubule motor activity                                                                | 1. Cell cycle<br>2. Microtubule-based movement<br>3. Mitotic spindle elongation                                                                                                                                                   | NO                                                                              | KISC                          | YES | MHS1010-58406   | NO  | NO  |
| 21 | MED12                        | ASC1 NE+CRSP2 NE         | 1. ATP binding activity<br>2. DNA binding activity<br>3. DNA topoisomerase (ATP-hydrolyzing) activity                   | 1. DNA topological changing<br>2. Androgen receptor signaling pathway<br>3. Regulation of DNA-dependent transcription                                                                                                             | NO                                                                              | CC                            | YES | NO              | NO  | NO  |
| 21 | SFR7 (SFRS7)                 | CAPER NE                 | RNA binding activity                                                                                                    | mRNA Processing                                                                                                                                                                                                                   | NO                                                                              | 1. RRM<br>2. ZNF              | YES | MHS1010-9206052 | NO  | NO  |
| 21 | Transformer-2/SFRS10         | Caper NE                 | 1. RNA binding activity<br>2. Nucleic acid binding activity                                                             | Nuclear mRNA splicing via spliceosome                                                                                                                                                                                             | NO                                                                              | RRM                           | YES | NO              | YES | NO  |
| 21 | MNAT1                        | CDK7 S100 + NE           | 1. Ubiquitin-protein ligase activity<br>2. Zinc ion binding activity                                                    | 1. DNA repair<br>2. Cell cycle<br>3. Cell proliferation<br>4. Protein ubiquitination<br>5. Regulation of cyclin dependent protein kinase activity<br>6. Regulation of transcription from RNA polymerase II promoter transcription | NO                                                                              | RING                          | YES | MHS1010-57659   | NO  | NO  |
| 21 | PHF21A (BRAAF35)             | COREST NE                | 1. DNA binding activity<br>2. Helicase activity<br>3. Ubiquitin-protein ligase activity<br>4. Zinc ion binding activity | 1. Protein ubiquitination<br>2. Regulation of DNA-dependent transcription                                                                                                                                                         | NO                                                                              | 1. AT_hook<br>2. PHD<br>3. LZ | YES | MHS1010-73866   | NO  | NO  |
| 21 | TRAP1                        | CRASP2 NE                | 1. ATP binding activity<br>2. Nucleotide binding activity<br>3. Tumor necrosis factor receptor binding activity         | Protein folding and unfolding response                                                                                                                                                                                            | NO                                                                              |                               | YES | MHS1011-7508968 | YES | NO  |
| 21 | phosphorylase kinase alpha 2 | E6AP S100                | 1. Calmodulin binding activity<br>2. Phosphorylase kinase activity                                                      | 1. Carbohydrate metabolism<br>2. Generation of precursor metabolites and energy<br>3. Glycogen metabolism                                                                                                                         | 1. X-linked liver glycogenosis Type I<br>2. X-linked liver glycogenosis Type II |                               | NO  | MHS1011-75802   | NO  | NO  |
| 21 | NBS1                         | P300 NE                  | Damaged DNA binding activity                                                                                            | 1. Cell cycle checkpoint<br>2. Double-strand break repair                                                                                                                                                                         | Nijmegen breakage syndrome                                                      | 1. FHA<br>2. BRCT             | YES | EHS1001-7571564 | YES | YES |
| 21 | DNA-PKCs                     | 1. SRC-2<br>2. COREST NE | S/T kinase activity                                                                                                     | Ras/MAPK and PI3K/AKT signaling pathway                                                                                                                                                                                           | NO                                                                              | 1. PI3KC<br>2. LZ             | YES | NO              | YES | NO  |
| 21 | PSME3                        | SRC-3                    | Ubiquitin-specific protease activity                                                                                    | 1. DNA Replication<br>2. Cell Cycle (Mitotic)<br>3. Cell Cycle Checkpoints                                                                                                                                                        | NO                                                                              |                               | YES | MHS1011-59151   | YES | NO  |
| 20 | MED4 (DRIP36)                | ASC-1 NE                 | Thyroid hormone receptor and vitamin D receptor binding activity                                                        |                                                                                                                                                                                                                                   | NO                                                                              | CC                            | NO  | MHS1011-62520   | NO  | YES |
| 20 | KIAA0251                     | ASC-1 S100               | Carboxy-lyase activity                                                                                                  | Amino acid metabolism                                                                                                                                                                                                             | NO                                                                              | CC                            | NO  | MHS1010-9204351 | NO  | YES |
| 20 | PCBP3                        | CAPER NE                 | 1. DNA binding activity<br>2. RNA binding activity                                                                      | mRNA metabolism                                                                                                                                                                                                                   | NO                                                                              | KH                            | NO  | NO              | NO  | YES |
| 20 | KIAA0182                     | COREST S100 + NE         | 1. Ubiquitin-protein ligase activity<br>2. Zinc ion binding activity                                                    | Protein ubiquitination                                                                                                                                                                                                            | NO                                                                              | CC                            | YES | NO              | NO  | YES |
| 20 | THRAP1                       | CRASP2 NE                | Thyroid hormone receptor and Vitamin D receptor binding activity                                                        | 1. Androgen receptor signaling pathway<br>2. Regulation of DNA-dependent transcription<br>3. Transcription initiation from RNA polymerase II promoter                                                                             | NO                                                                              | NO                            | YES | NO              | NO  | YES |
| 20 | PPARBP                       | CRASP2 NE                | 1. DNA binding activity<br>2. Thyroid hormone receptor binding activity                                                 | 1. Androgen receptor signaling pathway<br>2. Regulation of DNA-dependent transcription                                                                                                                                            | NO                                                                              |                               | YES | NO              | NO  | YES |

|    |                  |                                   |                                                                                                                                                                                                       |                                                                                                                                                                                                                         |                      |                                                            |     |                 |     |     |
|----|------------------|-----------------------------------|-------------------------------------------------------------------------------------------------------------------------------------------------------------------------------------------------------|-------------------------------------------------------------------------------------------------------------------------------------------------------------------------------------------------------------------------|----------------------|------------------------------------------------------------|-----|-----------------|-----|-----|
| 20 | CDC42BPB         | CRASP3 NE                         | 1. ATP binding activity<br>2. S/T kinase activity<br>3. Small GTPase regulator activity                                                                                                               | 1. Establishment and/or maintenance of cell polarity<br>2. Intracellular signaling cascade<br>3. Protein amino acid phosphorylation                                                                                     | NO                   | 1. S/T KINASE domain<br>2. C1<br>3. PH<br>4. CNH<br>5. PBD | NO  | NO              | NO  | YES |
| 20 | G160<br>(GCP170) | E6AP S100                         | Transporter activity                                                                                                                                                                                  | Intra-Golgi transport                                                                                                                                                                                                   | NO                   | 1. NLS<br>2. CC                                            | YES | NO              | NO  | YES |
| 19 | CDC2L5           | ACS-1 NE                          | 1. ATP binding activity<br>2. S/T kinase activity<br>3. Tyrosine kinase activity                                                                                                                      | 1. Positive regulation of cell proliferation<br>2. Protein amino acid phosphorylation<br>3. Regulation of mitosis                                                                                                       | NO                   | S/T KINASE domain                                          | NO  | NO              | YES | NO  |
| 19 | CRSP6            | 1. ASC1 NE<br>2. CRASP2 NE        | Thyroid hormone receptor binding activity                                                                                                                                                             | 1. Androgen receptor signaling pathway<br>2. Regulation of transcription from RNA polymerase II promoter                                                                                                                | NO                   |                                                            | YES | MHS1011-76878   | NO  | NO  |
| 19 | HNRPU            | 1. CDK7 NE<br>2. CRASP2 NE        | 1. ATP binding activity<br>2. DNA binding activity<br>3. RNA binding activity                                                                                                                         | RNA processing                                                                                                                                                                                                          | NO                   | 1. SAP<br>2. SPRY                                          | YES | NO              | NO  | NO  |
| 19 | TOP2B            | CDK7 NE                           | 1. ATP binding activity<br>2. DNA topoisomerase (ATP-hydrolyzing) activity                                                                                                                            | DNA topological changing                                                                                                                                                                                                | NO                   | NES                                                        | YES | NO              | NO  | NO  |
| 19 | RREB1            | COREST NE                         | 1. DNA binding activity<br>2. Zinc ion binding activity                                                                                                                                               | 1. Ras signal transduction<br>2. Regulation of DNA-dependent transcription                                                                                                                                              | NO                   | ZNFC2                                                      | YES | NO              | NO  | NO  |
| 19 | SMC1L1           | COREST NE                         | 1. ATP binding activity<br>2. ATPase activity<br>3. Microtubule motor activity                                                                                                                        | 1. signal transduction of DNA damage response<br>2. DNA repair<br>3. Cell cycle<br>4. Cell cycle checkpoint<br>5. Cell division<br>6. Chromosome organization and biogenesis<br>7. Chromosome segregation<br>8. Meiosis | NO                   | CC                                                         | YES | NO              | YES | NO  |
| 19 | HSPA8            | 1. COREST S100<br>2. CRASP2 NE    | 1. ATP binding activity<br>2. ATPase activity<br>3. Unfolded protein binding                                                                                                                          | Protein folding and unfolding response                                                                                                                                                                                  | NO                   | CC                                                         | YES | MHS1010-7429943 | NO  | NO  |
| 19 | THRAP4           | CRASP2 NE                         | 1. ATP binding activity<br>2. Metal ion binding<br>3. Thyroid hormone receptor and Vitamin D receptor binding activity                                                                                | 1. Androgen receptor signaling pathway<br>2. Regulation of DNA-dependent transcription                                                                                                                                  | NO                   |                                                            | YES | HS1380-8846793  | NO  | NO  |
| 19 | THRAP5           | CRASP2 NE                         | Thyroid hormone receptor and vitamin D receptor binding activity                                                                                                                                      | 1. Androgen receptor signaling pathway<br>2. Regulation of transcription from RNA polymerase II promoter                                                                                                                | NO                   | WD40                                                       | YES | NO              | NO  | NO  |
| 19 | CALM2            | E6AP S100                         | NO                                                                                                                                                                                                    | 1. Calcium signaling pathway<br>2. Phosphatidylinositol signaling system                                                                                                                                                | Huntington's disease | EF                                                         | YES | MHS1010-57423   | NO  | YES |
| 19 | Rad50            | 1. P300 NE<br>2. CoREST S100 + NE | 1. 3'-5' exonuclease activity<br>2. ATP binding activity<br>3. ATPase activity<br>4. Endonuclease activity<br>5. Hydrolase activity<br>6. Single-stranded DNA specific endodeoxyribonuclease activity | 1. Cell cycle<br>2. Double-strand break repair<br>3. Meiosis<br>4. Meiotic recombination<br>5. Regulation of mitotic recombination<br>6. Telomerase-dependent telomere maintenance                                      | NO                   | CC                                                         | YES | NO              | YES | NO  |
| 19 | HYD              | 1. SRC-1 NE<br>2. SRC-2 NE        | HECT activity                                                                                                                                                                                         | Ubiquitin-dependent protein catabolism                                                                                                                                                                                  | NO                   | 1. UBA<br>2. HECT                                          | YES | NO              | NO  | NO  |
| 18 | TRIP4            | ASC-1 NE + S100                   | 1. Ligand-dependent nuclear receptor binding<br>2. Metal ion binding                                                                                                                                  | Regulation of DNA-dependent transcription                                                                                                                                                                               | NO                   |                                                            | YES | MHS1010-58048   | YES | YES |
| 18 | CRK7             | ASC-1 NE                          | 1. ATP binding activity<br>2. S/T kinase activity                                                                                                                                                     | NO                                                                                                                                                                                                                      | NO                   | S/T KINASE domain                                          | YES | NO              | YES | YES |

|    |                    |                             |                                                                                                                                                                     |                                                                                                                                                                                                |    |                                   |     |                 |     |     |
|----|--------------------|-----------------------------|---------------------------------------------------------------------------------------------------------------------------------------------------------------------|------------------------------------------------------------------------------------------------------------------------------------------------------------------------------------------------|----|-----------------------------------|-----|-----------------|-----|-----|
| 18 | HNRPK              | 1. CDK7 NE<br>2. CRASP2 NE  | 1. DNA binding activity<br>2. RNA binding activity                                                                                                                  | NO                                                                                                                                                                                             | NO | KH                                | YES | MHS1011-58749   | NO  | YES |
| 18 | HSPA5              | CRASP2 NE                   | 1. ATP binding activity<br>2. Nucleotide binding activity                                                                                                           | NO                                                                                                                                                                                             | NO | 1. SP<br>2. CC                    | YES | MHS1011-7509143 | NO  | YES |
| 17 | CRSP2              | 1. ASC-1 NE<br>2. CRASP2 NE | Thyroid hormone receptor and<br>Vitamin D receptor binding activity                                                                                                 | 1. Androgen receptor signaling pathway<br>2. Transcription initiation from RNA polymerase II promoter                                                                                          | NO |                                   | YES | NO              | NO  | NO  |
| 17 | AcinusL<br>(ACIN1) | CAPER NE                    | 1. ATPase activity<br>2. DNA binding activity                                                                                                                       | 1. Apoptotic chromosome condensation<br>2. Erythrocyte differentiation<br>3. Positive regulation of monocyte differentiation                                                                   | NO | 1. SAP<br>2. RNP-1<br>3. ATROPHIN | NO  | NO              | NO  | NO  |
| 17 | SAP155<br>/SF3B1   | CAPER NE                    | 1. RNA splicing factor activity<br>2. Transesterification                                                                                                           | mRNA Processing                                                                                                                                                                                | NO | CC                                | YES | NO              | NO  | NO  |
| 17 | S164/RBM25         | CAPER NE                    | mRNA binding activity                                                                                                                                               | 1. mRNA processing<br>2. Nuclear mRNA splicing via spliceosome                                                                                                                                 | NO | 1. RRM<br>2. PWI                  | NO  | NO              | NO  | NO  |
| 17 | C20orf129          | COREST S100                 | 1. ATP binding activity<br>2. tRNA ligase activity                                                                                                                  | 1. Protein biosynthesis<br>2. tRNA aminoacylation for protein translation                                                                                                                      | NO |                                   | NO  | NO              | NO  | NO  |
| 17 | NFAT4              | SRC-3                       | NO                                                                                                                                                                  | 1. Inflammatory response<br>2. Wnt/Ca2 pathway                                                                                                                                                 | NO | 1. RHD<br>2. IPT                  | YES | MHS1010-57423   | YES | YES |
| 16 | ASCC3<br>(HELIC1)  | ASC1 NE + S100              | 1. ATP binding activity<br>2. ATP-dependent helicase activity<br>3. Hydrolase activity<br>4. Nucleic acid binding activity<br>5. Nucleoside-triphosphatase activity | Regulation of DNA-dependent transcription                                                                                                                                                      | NO | 1. DEXDc<br>2. HELIC<br>3. CC     | YES | NO              | NO  | YES |
| 16 | POLR2B             | CRASP2 NE                   | 1. DNA binding activity<br>2. DNA-directed RNA polymerase activity<br>3. Metal ion binding activity                                                                 | Transcription from RNA polymerase II promoter                                                                                                                                                  | NO |                                   | YES | MHS1011-7508765 | NO  | YES |
| 15 | SPAG9              | CRASP2 NE                   | NO                                                                                                                                                                  | Spermatogenesis                                                                                                                                                                                | NO | 1. TM<br>2. LZ                    | YES | NO              | YES | YES |
| 15 | 53BP1              | P300 NE                     | NO                                                                                                                                                                  | 1. Nucleotide metabolism<br>2. DNA repair                                                                                                                                                      | NO | BRCT                              | YES | NO              | YES | YES |
| 15 | RIF                | SRC-2 -NE                   | ATPase activity                                                                                                                                                     | DNA repair                                                                                                                                                                                     | NO |                                   | NO  | NO              | NO  | NO  |
| 14 | SCYL2              | ASC-1 NE                    | 1. ATP binding activity<br>2. S/T kinase activity                                                                                                                   | Protein amino acid phosphorylation                                                                                                                                                             | NO | CC                                | NO  | MHS1010-9206266 | NO  | YES |
| 14 | CCNH               | CDK7 S100 + NE              | NO                                                                                                                                                                  | 1. DNA repair<br>2. Cell cycle<br>3. Regulation of cyclin dependent protein kinase activity<br>4. Regulation of progression through cell cycle<br>5. Regulation of DNA-dependent transcription | NO | CYCLIN                            | YES | MHS1011-62462   | YES | NO  |
| 14 | PSPC1              | CRASP2 NE                   | 1. RNA binding activity<br>2. Nucleotide binding activity                                                                                                           | NO                                                                                                                                                                                             | NO | RRM                               | NO  | NO              | NO  | YES |
| 13 | ZBTB2              | CBP NE                      | 1. DNA binding activity<br>2. Zinc ion binding activity                                                                                                             | Regulation of DNA-dependent transcription                                                                                                                                                      | NO | 1. BTB<br>2. ZNFC2                | NO  | MHS1011-7508941 | NO  | NO  |
| 13 | ZNF639             | CBP NE                      | 1. DNA binding activity<br>2. Zinc ion binding activity                                                                                                             | Regulation of DNA-dependent transcription                                                                                                                                                      | NO | ZNF                               | NO  | MHS1010-58132   | NO  | NO  |
| 13 | ZNF38              | COREST NE                   | Zinc ion binding activity                                                                                                                                           | Regulation of DNA-dependent transcription                                                                                                                                                      | NO | 1. LER<br>2. ZNFC2                | NO  | MHS1010-73866   | NO  | NO  |

|    |                                               |                             |                                                           |                                                                                                                                                                                                |    |                               |     |                 |     |     |
|----|-----------------------------------------------|-----------------------------|-----------------------------------------------------------|------------------------------------------------------------------------------------------------------------------------------------------------------------------------------------------------|----|-------------------------------|-----|-----------------|-----|-----|
| 14 | CCNH                                          | CDK7 S100 + NE              | NO                                                        | 1. DNA repair<br>2. Cell cycle<br>3. Regulation of cyclin dependent protein kinase activity<br>4. Regulation of progression through cell cycle<br>5. Regulation of DNA-dependent transcription | NO | CYCLIN                        | YES | MHS1011-62463   | YES | NO  |
| 14 | PSPC2                                         | CRASP2 NE                   | 1. RNA binding activity<br>2. Nucleotide binding activity | NO                                                                                                                                                                                             | NO | RRM                           | NO  | NO              | NO  | YES |
| 13 | P115 (Vesicle docking protein P115)           | SRC-2 NE                    | NO                                                        | Transport                                                                                                                                                                                      | NO | CC                            | YES | NO              | YES | YES |
| 12 | SnRNP core D1/SNRPD1                          | Caper NE                    | NO                                                        | mRNA Processing                                                                                                                                                                                | NO | SM                            | YES | MHS1010-58132   | NO  | NO  |
| 12 | RCOR1 (CoREST)                                | COREST S100 + NE            | DNA binding activity                                      | Regulation of transcription                                                                                                                                                                    | NO | SANT                          | YES | NO              | YES | NO  |
| 11 | ZNF592                                        | ASC-1 NE                    | 1. DNA binding activity<br>2. Zinc ion binding activity   | Regulation of DNA-dependent transcription                                                                                                                                                      | NO | ZNFC2                         | NO  | NO              | NO  | NO  |
| 11 | YWHAE (14-3-3E)                               | ASC-1 NE                    | NO                                                        | NO                                                                                                                                                                                             | NO | ACETYLATION domain            | YES | MHS1010-57459   | YES | YES |
| 11 | TPR                                           | SRC-3                       | NO                                                        | Protein-nucleus import                                                                                                                                                                         | NO | CC                            | YES | NO              | NO  | YES |
| 11 | CCNK                                          | ASC-1 NE                    | NO                                                        | 1. Cell division<br>2. Mitosis<br>3. Regulation of cyclin dependent protein kinase activity<br>4. Regulation of DNA-dependent transcription                                                    | NO | CYCLIN domain                 | YES | NO              | NO  | NO  |
| 10 | GTF2H4                                        | CDK7 NE                     | NO                                                        | 1. DNA repair<br>2. Regulation of DNA-dependent transcription                                                                                                                                  | NO |                               | YES | MHS1011-60577   | NO  | NO  |
| 10 | HMG20B                                        | COREST NE                   | DNA binding activity                                      | 1. Cell cycle<br>2. Chromatin modification<br>3. Regulation of DNA-dependent transcription                                                                                                     | NO | CC                            | YES | MHS1011-60581   | NO  | NO  |
| 10 | CRSP7                                         | CRASP2 NE                   | Transcription coactivator activity                        | Defense response                                                                                                                                                                               | no | TFS                           | YES | NO              | NO  | NO  |
| 10 | PSMD3                                         | E6AP S100                   | NO                                                        | Proteasomal pathway                                                                                                                                                                            | NO | PINT                          | NO  | MHS1011-59734   | NO  | NO  |
| 10 | Homo sapiens putative NFkB activating protein | SRC-2 S100                  | NO                                                        | Positive regulation of I-kappaB kinase/NF-kappaB cascade                                                                                                                                       | NO | 1. DM14<br>2. C2              | NO  | NO              | YES | NO  |
| 9  | ZCW3                                          | SRC-3 S100                  | NO                                                        | NO                                                                                                                                                                                             | NO | 1. SP<br>2. CC                | NO  | MHS1011-169949  | YES | YES |
| 8  | SDK3/PNN                                      | CAPER NE                    | Structural molecule activity                              | Cell Adhesion                                                                                                                                                                                  | NO | CC                            | YES | NO              | NO  | NO  |
| 8  | OSBPL3                                        | CRASP3 NE                   | Nucleic acid binding activity                             | 1. Lipid transport<br>2. Steroid metabolism                                                                                                                                                    | NO | 1. PH<br>2. CC                | NO  | NO              | NO  | NO  |
| 7  | PRKCBP1                                       | 1. ASC-1 NE<br>2. COREST NE | 1. DNA binding activity<br>2. Metal ion binding activity  | Regulation of DNA-dependent transcription                                                                                                                                                      | NO | 1. PHD<br>2. BROMO<br>3. PWWP | YES | NO              | NO  | YES |
| 7  | ASCC1                                         | ASC1 NE                     | Nucleic acid binding activity                             | Regulation of DNA-dependent transcription                                                                                                                                                      | NO | KH                            | YES | NO              | NO  | YES |
| 7  | CRSP8                                         | ASC-1 NE                    | Transcription coactivator activity                        | 1. Regulation of transcription from RNA polymerase II promoter<br>2. Transcription initiation from RNA polymerase II promoter                                                                  | NO |                               | YES | MHS1010-9206020 | NO  | YES |

|   |                     |                             |                                    |                                                             |                      |                  |     |                 |     |     |
|---|---------------------|-----------------------------|------------------------------------|-------------------------------------------------------------|----------------------|------------------|-----|-----------------|-----|-----|
| 7 | SRRM1               | Caper NE                    | NO                                 | NO                                                          | NO                   | PWI              | YES | NO              | NO  | YES |
| 6 | CMIP                | COREST S100                 | NO                                 | NO                                                          | NO                   | 1. PH<br>2. LRR  | YES | NO              | NO  | YES |
| 6 | CRSP3               | 1. CRSP3 NE<br>2. CRASP2 NE | Transcription coactivator activity | Regulation of transcription from RNA polymerase II promoter | NO                   |                  | YES | MHS1010-9204293 | NO  | YES |
| 6 | ASCC2               | ASC-1 NE + S100             | NO                                 | Regulation of DNA-dependent transcription                   | NO                   | CUE              | YES | MHS1011-7508906 | NO  | NO  |
| 6 | SHCBP1              | ASC-1 NE                    | NO                                 | NO                                                          | NO                   | PbH1             | YES | MHS1010-7295541 | NO  | NO  |
| 6 | PRPF31              | CDK7 NE                     | NO                                 | NO                                                          | Retinitis pigmentosa |                  | NO  | NO              | YES | NO  |
| 6 | TRIP230<br>(TRIP11) | SRC-1 NE                    | NO                                 | NO                                                          | NO                   | 1. SP<br>2. CC   | YES | NO              | YES | NO  |
| 5 | C10orf3             | ASC-1 NE                    | NO                                 | NO                                                          | NO                   | CC               | NO  | MHS1011-61264   | NO  | YES |
| 5 | CGI-59/LUC7L2       | CAPER NE                    | NO                                 | NO                                                          | NO                   |                  | YES | NO              | NO  | YES |
| 4 | SAP18               | CAPER NE                    | Transcription corepressor activity | Regulation of transcription from RNA polymerase II promoter | NO                   |                  | YES | EHS1001-6807859 | NO  | NO  |
| 4 | BPY2IP1             | CDK7 S100 + NE              | NO                                 | Sturacture of Cytoskeleton                                  | NO                   |                  | YES | EHS1001-7516329 | NO  | NO  |
| 4 | SEPT9               | 1. CDK7 NE<br>2. CRASP2 NE  | NO                                 | NO                                                          | NO                   |                  | YES | IHS1380-8842345 | NO  | NO  |
| 4 | SART1               | CDK7 NE                     | NO                                 | NO                                                          | NO                   | CC               | YES | MHS1011-59718   | NO  | NO  |
| 4 | RCOR3               | COREST S100 + NE            | DNA binding activity               | Regulation of transcription                                 | NO                   | SANT             | YES | NO              | NO  | NO  |
| 4 | NEDD1               | P300 NE                     | NO                                 | NO                                                          | NO                   | WD40             | NO  | MHS1010-7295439 | NO  | NO  |
| 3 | VAC14               | CDK7 NE                     | NO                                 | NO                                                          | NO                   |                  | NO  | NO              | NO  | YES |
| 3 | ch-TOG/CKAP5        | CRASP2 NE                   | NO                                 | NO                                                          | NO                   |                  | NO  | NO              | NO  | YES |
| 3 | PCQAP               | CRASP2 NE                   | NO                                 | Regulation of DNA-dependent transcription                   | NO                   |                  | NO  | NO              | NO  | YES |
| 3 | FLJ21945            | E6AP S100                   | NO                                 | NO                                                          | NO                   | CC               | NO  | NO              | NO  | YES |
| 2 | AHNAK2              | ASC-1 NE                    | NO                                 | NO                                                          | NO                   |                  | NO  | MHS1010-9205042 | NO  | NO  |
| 2 | NY-REN-58           | ASC-1 NE                    | NO                                 | NO                                                          | NO                   | CC               | NO  | EHS1001-7373334 | NO  | NO  |
| 2 | FCHSD1              | ASC-1 S100                  | NO                                 | NO                                                          | NO                   | 1. FCH<br>2. SH3 | NO  | NO              | NO  | NO  |



|   |           |                              |    |    |    |                   |    |    |    |    |
|---|-----------|------------------------------|----|----|----|-------------------|----|----|----|----|
|   |           |                              |    |    |    |                   |    |    |    |    |
| 2 | AND 1     | 1. SRC-1 NE<br>2. SRC-2 S100 | NO | NO | NO | 1. WD40<br>2. HMG | NO | NO | NO | NO |
| 0 | IRF-2BP2A | CAPER S100                   | NO | NO | NO |                   | NO | NO | NO | NO |
