# Supplementary material
Source: PubMed Central journal article supplement (PMC1513068)
Supplement: nrs04014.sp2.pdf [file nrs04014.sp2.pdf]

Biological Scoring Part

Experimental Scoring Part

| Score | Protein Name  | Complex ID                   | Enzymatic Activity (9)                                                                                                                                                                                                             | Cellular Processes (6)                                                                                                                                                                                         | Human Disease (4)                                                                                                                                                             | Protein Motif (2)                    | Interacting Protein (2) | Full c-DNA name (2) | Antibody (2) | KO ES cell (3) |
|-------|---------------|------------------------------|------------------------------------------------------------------------------------------------------------------------------------------------------------------------------------------------------------------------------------|----------------------------------------------------------------------------------------------------------------------------------------------------------------------------------------------------------------|-------------------------------------------------------------------------------------------------------------------------------------------------------------------------------|--------------------------------------|-------------------------|---------------------|--------------|----------------|
| 26    | SPTAN1        | ASC1 NE                      | 1. Actin binding activity<br>2. Calcium ion binding activity<br>3. Calmodulin binding activity                                                                                                                                     | 1. Barbed-end actin filament capping<br>2. Tight junction                                                                                                                                                      | NO                                                                                                                                                                            | 1. SPECTRIN<br>2. SH3<br>3. EF       | YES                     | EHS1001-12305       | YES          | YES            |
| 25    | KARS          | COREST S100                  | 1. ATP binding activity<br>2. Lysine-tRNA ligase activity<br>3. tRNA binding activity                                                                                                                                              | 1. Lysyl-tRNA aminoacylation<br>2. Protein biosynthesis<br>3. tRNA processing                                                                                                                                  | NO                                                                                                                                                                            | TRNAA                                | YES                     | IHS1380-8840778     | NO           | NO             |
| 24    | GAPD          | CDK7 NE                      | 1. NAD binding activity<br>2. Glyceraldehyde-3-phosphate dehydrogenase (phosphorylating) activity<br>3. Oxidoreductase activity                                                                                                    | Glucose metabolism                                                                                                                                                                                             | NO                                                                                                                                                                            | ACETYLATION domain                   | YES                     | MHS1011-60031       | YES          | YES            |
| 24    | NCL           | CDK7 S100                    | 1. DNA binding activity<br>2. RNA binding activity                                                                                                                                                                                 | Nuclear mRNA splicing via spliceosome                                                                                                                                                                          | NO                                                                                                                                                                            | RRM                                  | YES                     | NO                  | YES          | YES            |
| 24    | SFPQ (PSF)    | 1. COREST NE<br>2. CRASP2 NE | 1. DNA binding activity<br>2. RNA binding activity                                                                                                                                                                                 | 1. DNA recombination<br>2. DNA repair<br>3. Nuclear mRNA splicing via spliceosome                                                                                                                              | NO                                                                                                                                                                            | RRM                                  | YES                     | NO                  | YES          | YES            |
| 24    | IQGAP1 (SAR1) | COREST S100                  | 1. GTPase inhibitor activity<br>2. Ras-GTPase activator activity<br>3. Calmodulin binding activity                                                                                                                                 | 1. Negative regulation of Ras- signal transduction<br>2. Small GTPase mediated signal transduction                                                                                                             | NO                                                                                                                                                                            | 1. CH<br>2. WW<br>3. IQ<br>4. RASGAP | YES                     | NO                  | YES          | YES            |
| 23    | FLNA          | ASC1 NE                      | Actin binding activity                                                                                                                                                                                                             | 1. Actin cytoskeleton organization and biogenesis<br>2. Cell motility<br>3. Cell surface receptor linked signal transduction<br>4. Neurogenesis<br>5. Positive regulation of I-kappaB kinase/NF-kappaB cascade | 1. Periventricular heterotopia<br>2. Otopalatodigital syndrome type 1<br>3. Otopalatodigital syndrome type 2<br>4. Frontometaphyseal dysplasia<br>5. Melnick-Needles syndrome | 1. CH<br>2. IGFLMN                   | YES                     | NO                  | NO           | NO             |
| 23    | ANXA2         | CDK7 NE                      | 1. Calcium ion binding activity<br>2. Calcium-dependent phospholipid binding activity<br>3. Cytoskeletal protein binding activity<br>4. Phospholipase inhibitor activity                                                           | Skeletal development                                                                                                                                                                                           | NO                                                                                                                                                                            | ANX                                  | YES                     | MHS1011-76690       | YES          | NO             |
| 23    | CAD           | SRC-2 S100                   | 1. ATP binding activity<br>2. Amino acid binding activity<br>3. Aspartate carbamoyltransferase activity<br>4. Carbamoyl-phosphate synthase (glutamine-hydrolyzing) activity<br>5. Dihydroorotase activity<br>6. Hydrolase activity | 1. 'de novo' pyrimidine base biosynthesis<br>2. Amino acid metabolism<br>3. Nitrogen compound metabolism                                                                                                       | NO                                                                                                                                                                            |                                      | YES                     | MHS1010-9206052     | YES          | YES            |
| 22    | LARS          | COREST S100                  | 1. ATP binding activity<br>2. Leucine-tRNA ligase activity                                                                                                                                                                         | tRNA aminoacylation for protein translation                                                                                                                                                                    | NO                                                                                                                                                                            |                                      | YES                     | IHS1382-8393442     | NO           | YES            |
| 22    | NONO          | CRASP2 NE                    | 1. DNA binding activity<br>2. RNA binding activity<br>3. SH3/SH2 adaptor activity                                                                                                                                                  | 1. DNA recombination<br>2. DNA repair<br>3. RNA splicing<br>4. Regulation of DNA-dependent transcription                                                                                                       | NO                                                                                                                                                                            | RRM                                  | YES                     | NO                  | NO           | YES            |
| 20    | EPRS          | COREST S100                  | 1. ATP binding activity<br>2. Glutamate-tRNA ligase activity<br>3. Proline-tRNA ligase activity                                                                                                                                    | 1. Glutamyl-tRNA aminoacylation<br>2. Prolyl-tRNA aminoacylation<br>3. Protein biosynthesis                                                                                                                    | NO                                                                                                                                                                            |                                      | YES                     | NO                  | NO           | YES            |
| 15    | CLTC          | ASC-1 NE                     | NO                                                                                                                                                                                                                                 | Intracellular protein transport                                                                                                                                                                                | NO                                                                                                                                                                            | CLH                                  | YES                     | MHS1010-9205173     | NO           | YES            |
